# Supplementary material for: Potential gains in life expectancy by reducing inequality of lifespans in Denmark: an international comparison and cause-of-death analysis
Source: PubMed Central journal article supplement (PMC6033219; doi:10.1186/s12889-018-5730-0), 2018-07-04
Supplement: 12889_2018_5730_MOESM6_ESM.pdf [file 12889_2018_5730_MOESM6_ESM.pdf]

# Decomposition of standard deviation

Danish males. Negative (positive) values decrease (increase) SD

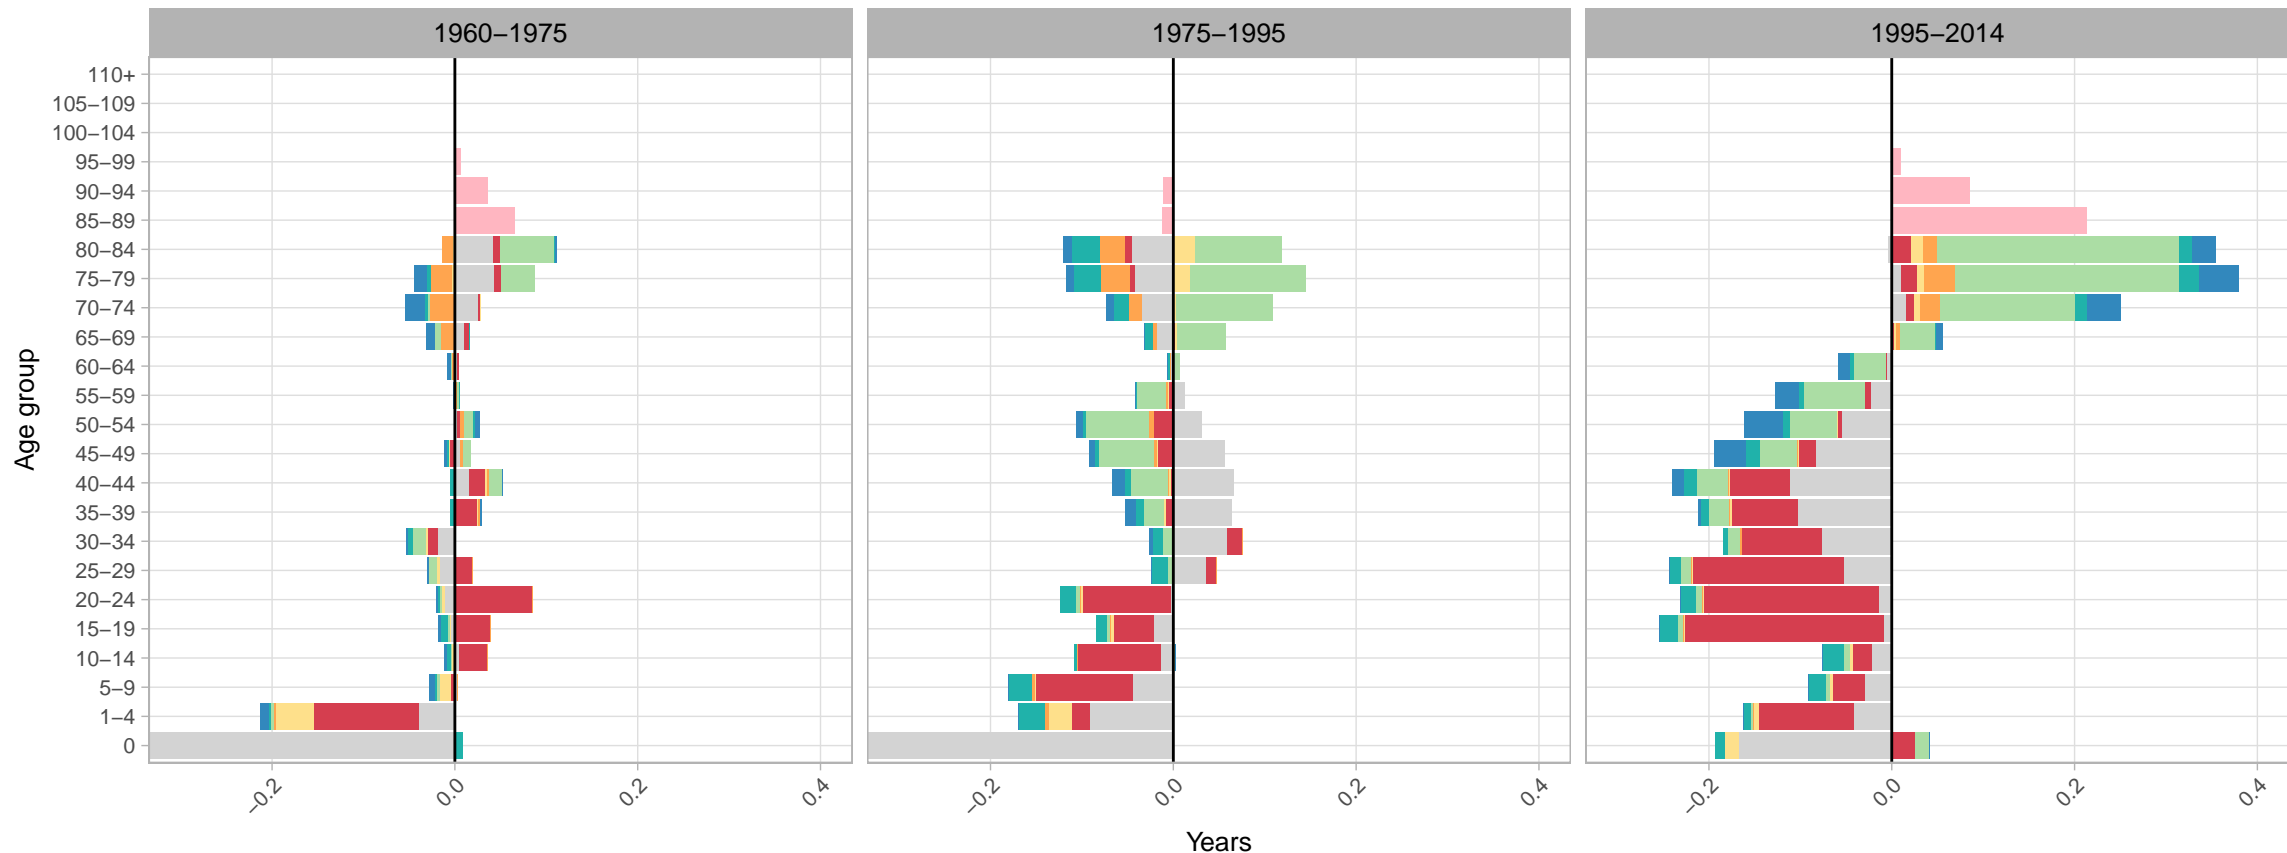

Cause of death

- Smoking related cancer
- Cardiovascular
- Respiratory-Infectious
- Other
- Non-Smoking related cancer
- Respiratory-Non-infectious
- External
- Above age 85
