# Supplementary material for: Potential gains in life expectancy by reducing inequality of lifespans in Denmark: an international comparison and cause-of-death analysis
Source: Springer Nature journal article supplement (doi:10.1186/s12889-018-5730-0), 2018-07-04

## A Decomposition of life expectancy

Danish males. Negative (positive) values decrease (increase) life expectancy

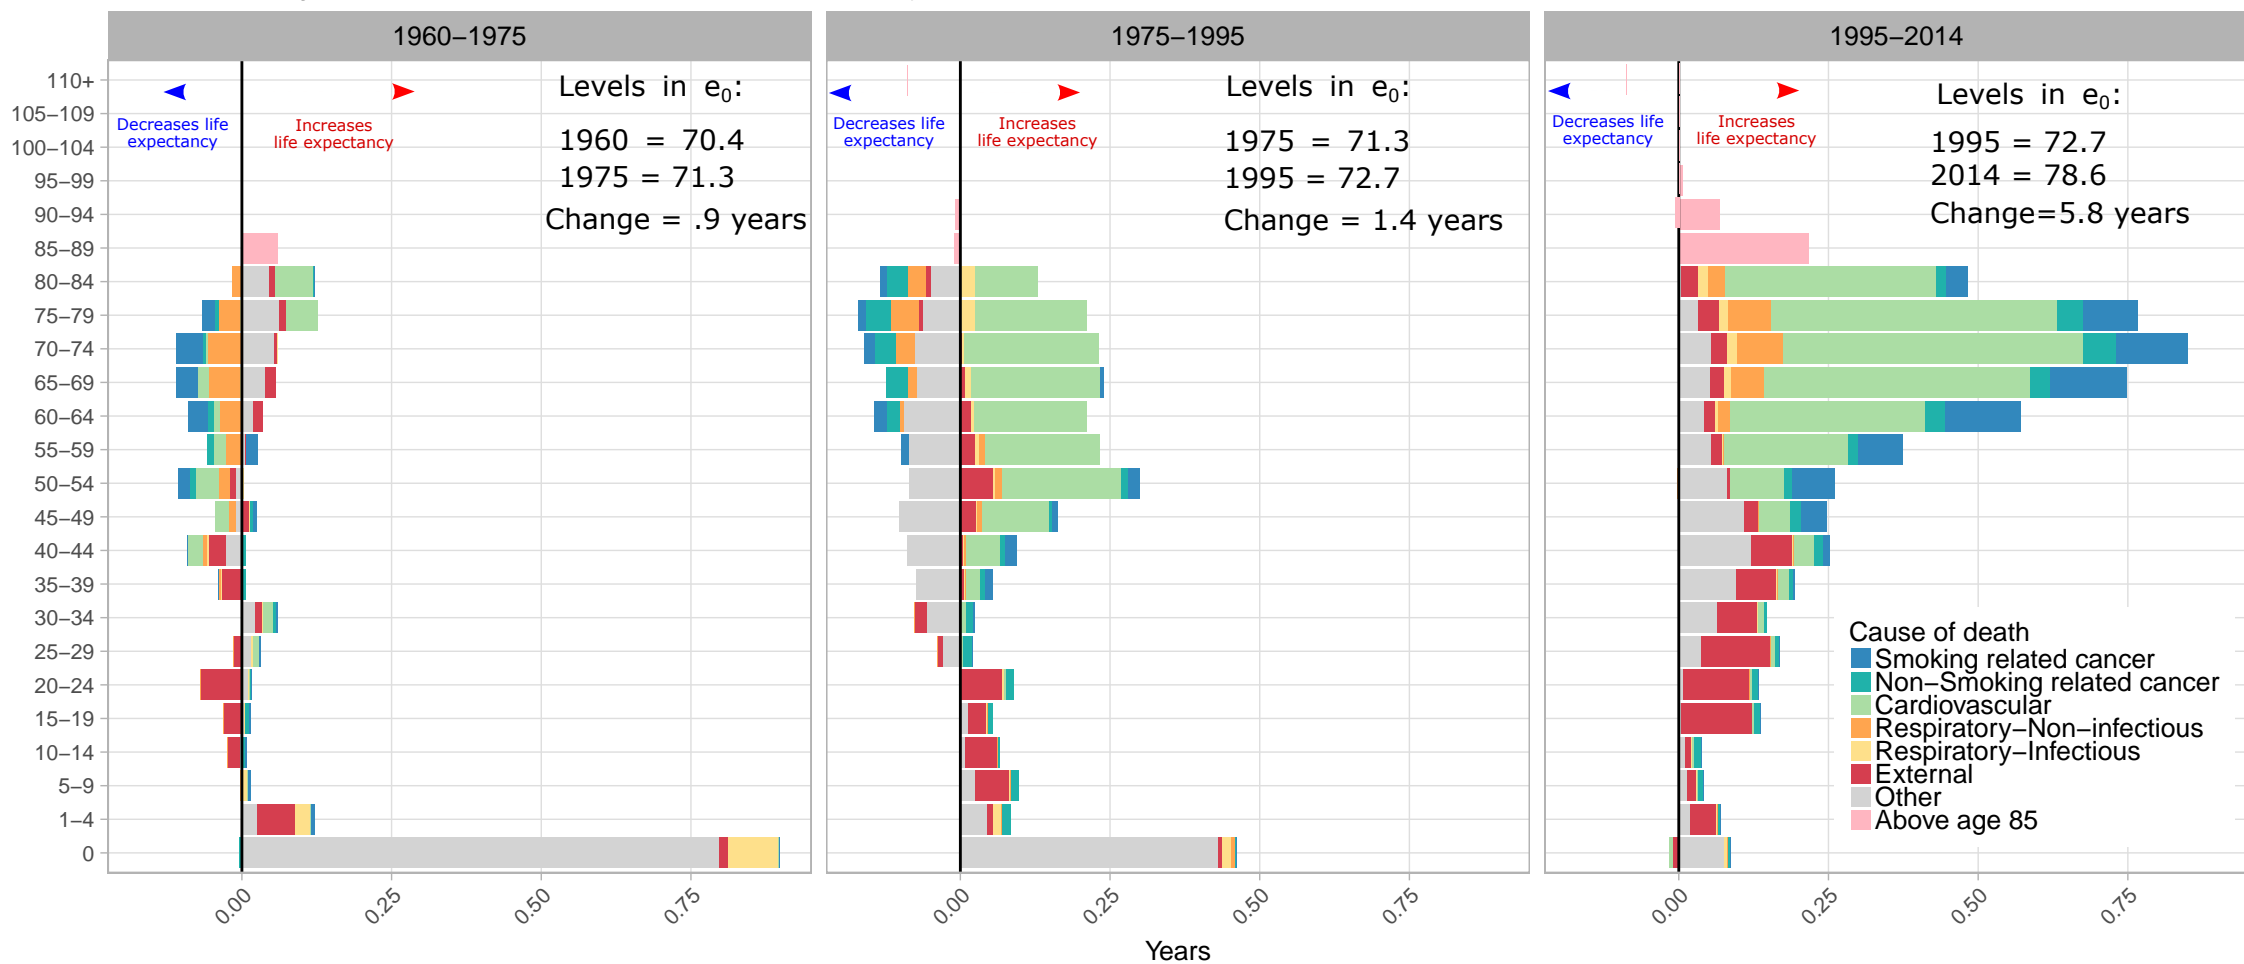

## B Decomposition of lifespan inequality (CoV)

Danish Males. Negative (positive) values decrease (increase) CoV

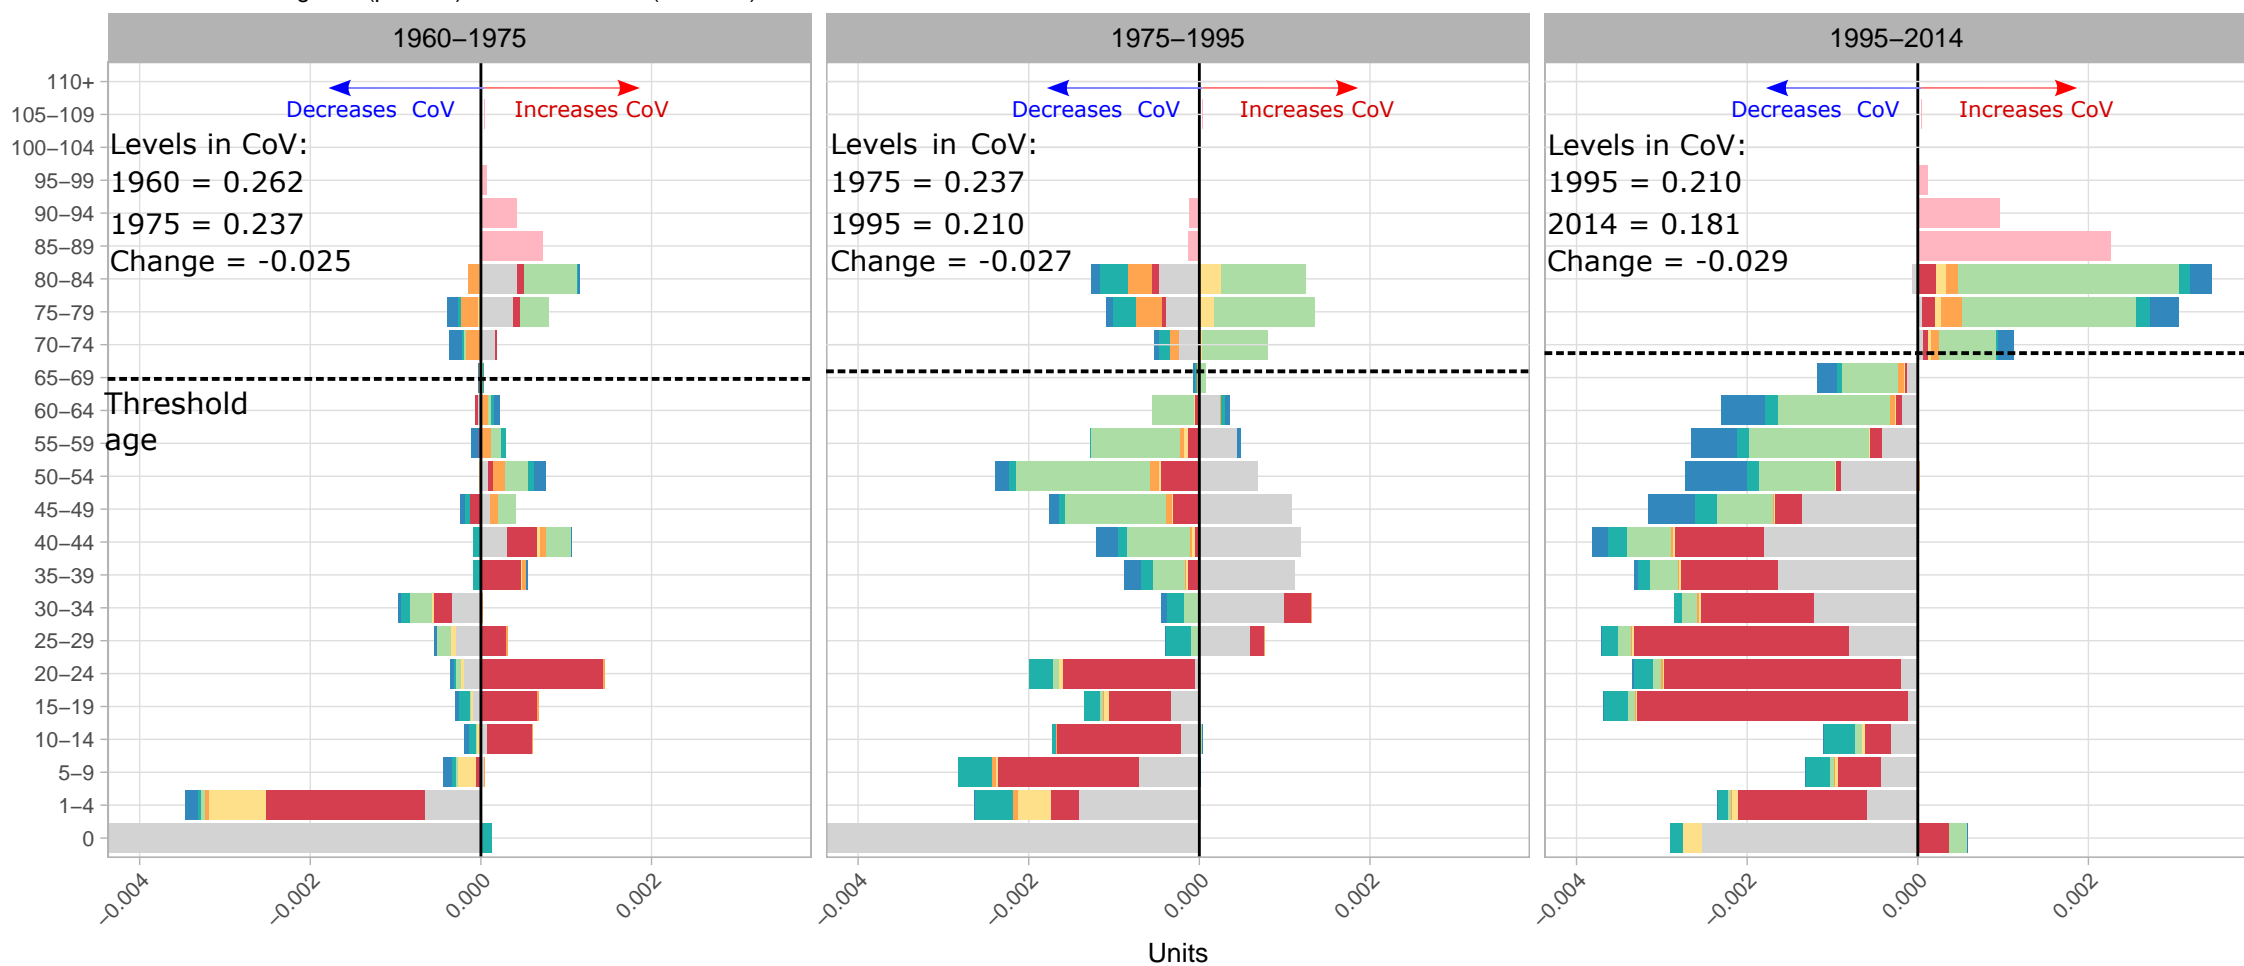

Supplement: MOESM3 [file 15908190]
