# Supplementary material for: Potential gains in life expectancy by reducing inequality of lifespans in Denmark: an international comparison and cause-of-death analysis
Source: Springer Nature journal article supplement (doi:10.1186/s12889-018-5730-0), 2018-07-04

# Trends in standard deviation

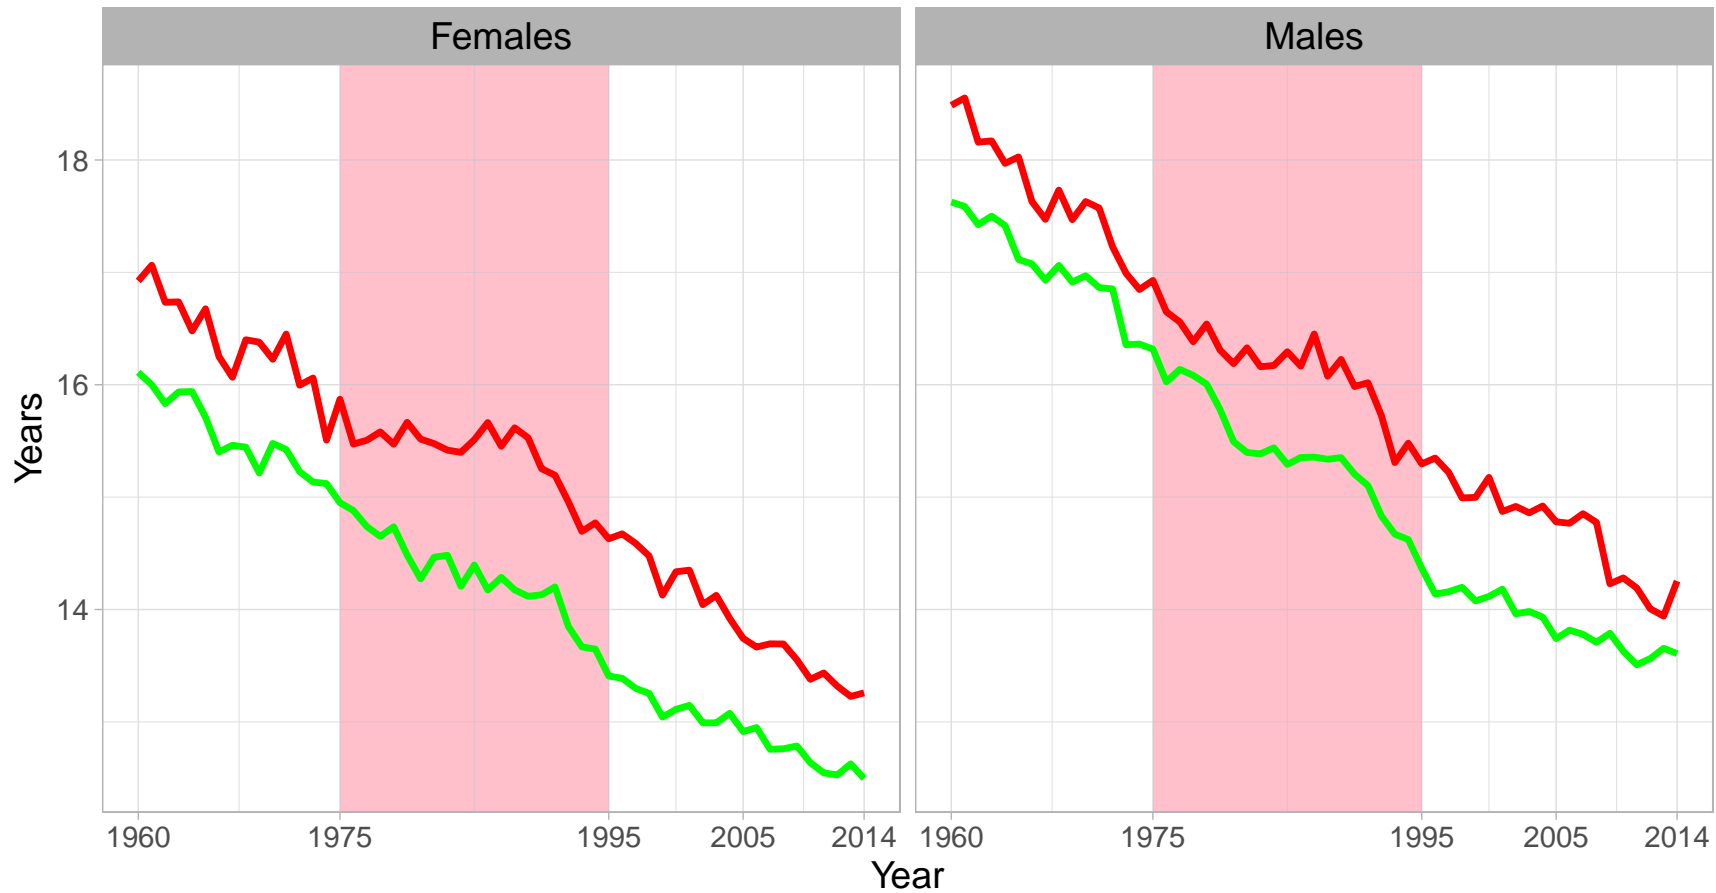

Supplement: MOESM4 [file 15908190]
