# Supplementary material for: Potential gains in life expectancy by reducing inequality of lifespans in Denmark: an international comparison and cause-of-death analysis
Source: Springer Nature journal article supplement (doi:10.1186/s12889-018-5730-0), 2018-07-04
Supplement: MOESM5 [file 15908190]

# Decomposition of standard deviation

Danish females. Negative (positive) values decrease (increase) SD

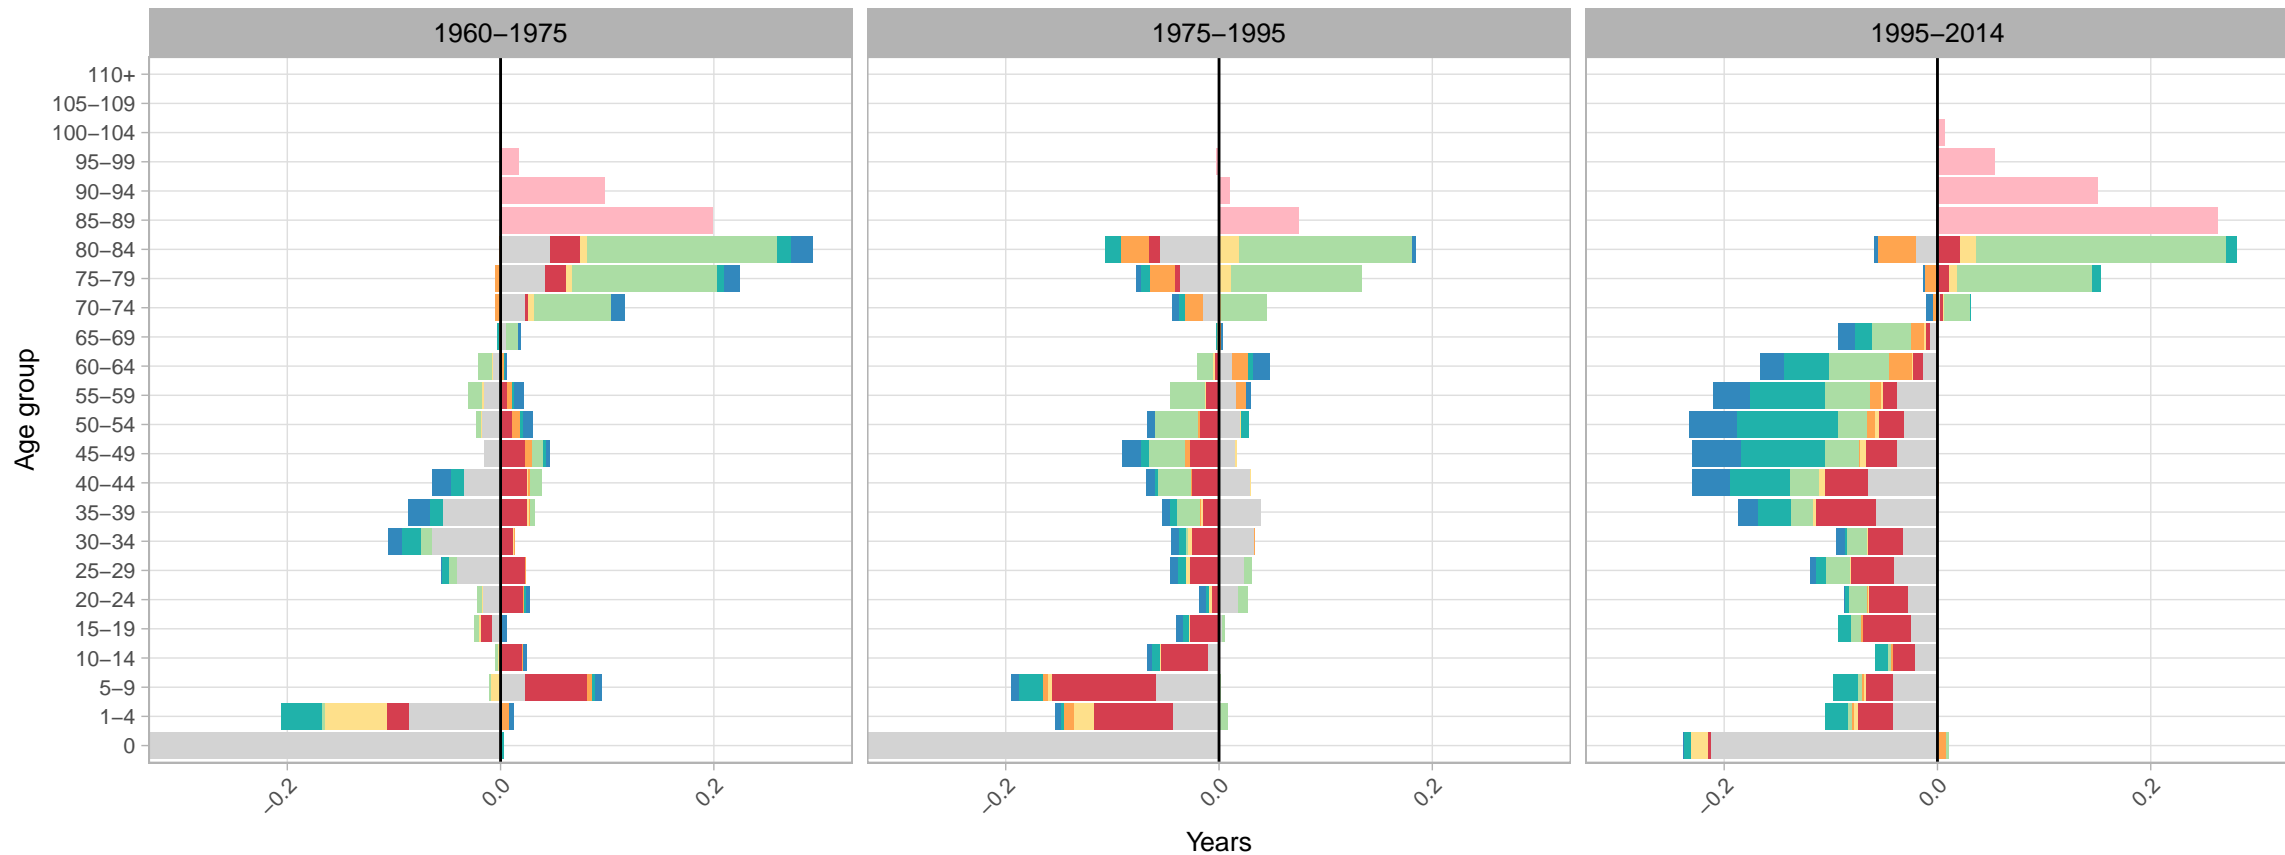

Cause of death

- Smoking related cancer
- Non-Smoking related cancer
- Cardiovascular
- Respiratory-Non-infectious
- Respiratory-Infectious
- External
- Other
- Above age 85
